# Supplementary material for: Efficacy of Unsupervised Self-Collected Mid-Turbinate FLOQSwabs for the Diagnosis of Coronavirus Disease 2019 (COVID-19)
Source: MDPI journal article supplement (doi:10.3390/v13081663), 2021-08-22
Supplement: s1 [file s1]

**Supplemental Table S1. Diagnostic sensitivity, specificity, positive and negative predictive values**

| SC Swabs vs HCP Swabs            |         |                         |
|----------------------------------|---------|-------------------------|
|                                  | Ratio % | 95% Confidence Interval |
| <i>Sensitivity</i>               | 94,23   | 84,05- 98,79            |
| <i>Specificity</i>               | 95,65   | 78,05-99,89             |
| <i>PPV<sup>a</sup></i>           | 98,00   | 87,80-99,70             |
| <i>NPV<sup>b</sup></i>           | 88,00   | 70,90- 95,67            |
| <i>Positive Likelihood Ratio</i> | 21,67   | 3,18-147,55             |
| <i>Accuracy</i>                  | 94,67   | 86,90-98,53             |

<sup>a</sup>PPV: Positive Predictive Value, <sup>b</sup>NPV: Negative Predictive Value

**Supplemental Table S2. Results of qRT-PCR performed on SC swabs immediately placed in eNAT medium (t0) and SC swabs dry stored at room temperature for 6 days.**

| SC swabs in eNAT |           |                 | SC swabs dry        |                 |                     |
|------------------|-----------|-----------------|---------------------|-----------------|---------------------|
| Sample ID        | Target    | Ct <sup>a</sup> | Result <sup>b</sup> | Ct <sup>a</sup> | Result <sup>b</sup> |
| #A               | MS2       | 27,9            | Positive            | 28,1            | Positive            |
|                  | N-gene    | 34,1            |                     | 33,9            |                     |
|                  | ORF1ab    | 33,7            |                     | 34              |                     |
|                  | S-gene    | 37,4            |                     | 37,1            |                     |
|                  | B- globin | 28,1            | Valid               | 28,3            | Valid               |
| #B               | MS2       | 27,9            | Positive            | 28,2            | Positive            |
|                  | N-gene    | 34,1            |                     | 34,3            |                     |
|                  | ORF1ab    | 33,7            |                     | 33,9            |                     |
|                  | S-gene    | 37,4            |                     | 37              |                     |
|                  | B- globin | 29,8            | Valid               | 29,7            | Valid               |
| #C               | MS2       | 26,4            | Negative            | 27,1            | Negative            |
|                  | N-gene    | Undetermined    |                     | Undetermined    |                     |
|                  | ORF1ab    | Undetermined    |                     | Undetermined    |                     |
|                  | S-gene    | Undetermined    |                     | Undetermined    |                     |
|                  | B- globin | 27,4            | Valid               | 26,9            | Valid               |
| #D               | MS2       | 24,7            | Negative            | 24,9            | Negative            |
|                  | N-gene    | 37,5            |                     | 37,8            |                     |
|                  | ORF1ab    | Undetermined    |                     | Undetermined    |                     |
|                  | S-gene    | Undetermined    |                     | Undetermined    |                     |
|                  | B- globin | 29,4            | Valid               | 29,8            | Valid               |
| #E               | MS2       | 24,7            | Negative            | 24,1            | Negative            |
|                  | N-gene    | 37,5            |                     | 37,3            |                     |
|                  | ORF1ab    | Undetermined    |                     | Undetermined    |                     |
|                  | S-gene    | Undetermined    |                     | Undetermined    |                     |
|                  | B- globin | 28,4            | Valid               | 29,1            | Valid               |

<sup>a</sup>Ct of Viral genes, MS2 control, and b-globin

<sup>b</sup>The test results

**Supplemental Table S3. Diagnostic sensitivity, specificity, positive and negative predictive values**

| SC Swabs vs HCP Swabs            |         |                         |
|----------------------------------|---------|-------------------------|
|                                  | Ratio % | 95% Confidence Interval |
| <i>Sensitivity</i>               | 94,23   | 84,05- 98,79            |
| <i>Specificity</i>               | 95,65   | 78,05-99,89             |
| <i>PPV<sup>a</sup></i>           | 98,00   | 87,80-99,70             |
| <i>NPV<sup>b</sup></i>           | 88,00   | 70,90- 95,67            |
| <i>Positive Likelihood Ratio</i> | 21,67   | 3,18-147,55             |
| <i>Accuracy</i>                  | 94,67   | 86,90-98,53             |

<sup>a</sup>PPV: Positive Predictive Value, <sup>b</sup>NPV: Negative Predictive Value

**Supplemental Table S4. Results of the *in vitro* stability test. B-globin was reported separately.**

| Sample      | Target | Ct           | Sample      | Target | Ct    |
|-------------|--------|--------------|-------------|--------|-------|
| NEG 0h      | MS2    | 22,37        | POS 0h      | MS2    | 23,68 |
| NEG 0h      | N-gene | Undetermined | POS 0h      | N-gene | 23,83 |
| NEG 0h      | ORF1ab | Undetermined | POS 0h      | ORF1ab | 23,42 |
| NEG 0h      | S-gene | Undetermined | POS 0h      | S-gene | 22,64 |
| NEG 48h RT  | MS2    | 22,99        | POS 48h RT  | MS2    | 24,46 |
| NEG 48h RT  | N-gene | Undetermined | POS 48h RT  | N-gene | 23,90 |
| NEG 48h RT  | ORF1ab | Undetermined | POS 48h RT  | ORF1ab | 22,16 |
| NEG 48h RT  | S-gene | Undetermined | POS 48h RT  | S-gene | 23,29 |
| NEG 48h 4°C | MS2    | 22,52        | POS 48h 4°C | MS2    | 24,19 |
| NEG 48h 4°C | N-gene | Undetermined | POS 48h 4°C | N-gene | 22,39 |
| NEG 48h 4°C | ORF1ab | Undetermined | POS 48h 4°C | ORF1ab | 23,15 |
| NEG 48h 4°C | S-gene | Undetermined | POS 48h 4°C | S-gene | 23,27 |
| NEG 72h RT  | MS2    | 23,79        | POS 72h RT  | MS2    | 22,95 |
| NEG 72h RT  | N-gene | Undetermined | POS 72h RT  | N-gene | 23,75 |
| NEG 72h RT  | ORF1ab | Undetermined | POS 72h RT  | ORF1ab | 23,32 |
| NEG 72h RT  | S-gene | Undetermined | POS 72h RT  | S-gene | 22,99 |
| NEG 72h 4°C | MS2    | 22,79        | POS 72h 4°C | MS2    | 23,29 |
| NEG 72h 4°C | N-gene | Undetermined | POS 72h 4°C | N-gene | 23,03 |
| NEG 72h 4°C | ORF1ab | Undetermined | POS 72h 4°C | ORF1ab | 22,87 |

| Sample      | Target   | Ct           | Sample      | Target   | Ct    |
|-------------|----------|--------------|-------------|----------|-------|
| NEG 72h 4°C | S-gene   | Undetermined | POS 72h 4°C | S-gene   | 23,39 |
| NEG 6d RT   | MS2      | 24,29        | POS 6d RT   | MS2      | 23,71 |
| NEG 6d RT   | N-gene   | 38,66        | POS 6d RT   | N-gene   | 22,92 |
| NEG 6d RT   | ORF1ab   | Undetermined | POS 6d RT   | ORF1ab   | 22,08 |
| NEG 6d RT   | S-gene   | Undetermined | POS 6d RT   | S-gene   | 23,08 |
| NEG 6d 4°C  | MS2      | 23,60        | POS 6d 4°C  | MS2      | 24,15 |
| NEG 6d 4°C  | N-gene   | Undetermined | POS 6d 4°C  | N-gene   | 23,41 |
| NEG 6d 4°C  | ORF1ab   | Undetermined | POS 6d 4°C  | ORF1ab   | 23,20 |
| NEG 6d 4°C  | S-gene   | Undetermined | POS 6d 4°C  | S-gene   | 23,62 |
| NEG 0h      | B GLOBIN | 30,71        | POS 0h      | B GLOBIN | 31,97 |
| NEG 48h RT  | B GLOBIN | 31,22        | POS 48h RT  | B GLOBIN | 32,5  |
| NEG 48h 4°C | B GLOBIN | 31,35        | POS 48h 4°C | B GLOBIN | 32,7  |
| NEG 72h RT  | B GLOBIN | 30,86        | POS 72h RT  | B GLOBIN | 32,02 |
| NEG 72h 4°C | B GLOBIN | 31,36        | POS 72h 4°C | B GLOBIN | 32,84 |
| NEG 6d RT   | B GLOBIN | 31,78        | POS 6d RT   | B GLOBIN | 32,42 |
| NEG 6d 4°C  | B GLOBIN | 30,75        | POS 6d 4°C  | B GLOBIN | 32,6  |
